# Supplementary material for: A mobile restriction modification system consisting of methylases on the IncA/C plasmid
Source: PubMed Central journal article supplement (PMC6555945; doi:10.1186/s13100-019-0168-1), 2019-06-07
Supplement: 13100_2019_168_MOESM1_ESM.pdf [file 13100_2019_168_MOESM1_ESM.pdf]

Supplementary table 1. Genes with obviously changed methylation type in SMRT sequencing.

| Number | Local tag | C6706 |     | CV2 |     | TIGR Common Name                                             | Gene Symbol  | Mainrole                        | Subrole                                              |
|--------|-----------|-------|-----|-----|-----|--------------------------------------------------------------|--------------|---------------------------------|------------------------------------------------------|
|        |           | m4C   | m6A | m4C | m6A |                                                              |              |                                 |                                                      |
| 1      | VC_0025   | +     | +   | +   |     | hypothetical protein                                         |              |                                 |                                                      |
| 2      | VC_0141   | +     | +   | +   |     | hypothetical protein                                         |              |                                 |                                                      |
| 3      | VC_0367   | +     | +   | +   |     | primosomal replication protein N                             | <i>priB</i>  | DNA metabolism                  | DNA replication, recombination, and repair           |
| 4      | VC_0368   | +     | +   | +   |     | ribosomal protein S18                                        | <i>rpsR</i>  | Protein synthesis               | Ribosomal proteins: synthesis and modification       |
| 5      | VC_0686   | +     | +   | +   |     | hypothetical protein                                         |              |                                 |                                                      |
| 6      | VC_0912   | +     | +   | +   |     | hypothetical protein                                         |              |                                 |                                                      |
| 7      | VC_1007   | +     | +   | +   |     | hypothetical protein                                         |              |                                 |                                                      |
| 8      | VC_1020   | +     | +   | +   |     | hypothetical protein                                         |              |                                 |                                                      |
| 9      | VC_1109   | +     | +   | +   |     | hypothetical protein                                         |              |                                 |                                                      |
| 10     | VC_1142   | +     | +   | +   |     | cold shock-like protein CspD                                 | <i>cspD</i>  | Regulatory functions            | Other                                                |
| 11     | VC_1227   | +     | +   | +   |     | hypothetical protein                                         |              |                                 |                                                      |
| 12     | VC_1247   | +     | +   | +   |     | hypothetical protein                                         |              |                                 |                                                      |
| 13     | VC_1415   | +     | +   | +   |     | hcp protein                                                  | <i>hcp-1</i> | Unknown function                | General                                              |
| 14     | VC_1441   | +     | +   | +   |     | cytochrome c oxidase, subunit CcoO                           | <i>ccoO</i>  | Energy metabolism               | Electron transport                                   |
| 15     | VC_1474   | +     | +   | +   |     | conserved hypothetical protein                               |              | Hypothetical proteins           | Conserved                                            |
| 16     | VC_1487   | +     | +   | +   |     | conserved hypothetical protein                               |              | Hypothetical proteins           | Conserved                                            |
| 17     | VC_1569   | +     | +   | +   |     | hypothetical protein                                         |              |                                 |                                                      |
| 18     | VC_1835   | +     | +   | +   |     | peptidoglycan-associated lipoprotein                         | <i>pal</i>   | Cell envelope                   | Other                                                |
| 19     | VC_1962   | +     | +   | +   |     | lipoprotein                                                  |              | Cell envelope                   | Other                                                |
| 20     | VC_2170   | +     | +   | +   |     | hypothetical protein                                         |              |                                 |                                                      |
| 21     | VC_2200   | +     | +   | +   |     | flagellar basal-body rod protein FlgB                        | <i>flgB</i>  | Cellular processes              | Chemotaxis and motility                              |
| 22     | VC_2423   | +     | +   | +   |     | fimbrial protein                                             | <i>pilA</i>  | Cell envelope                   | Surface structures                                   |
| 23     | VC_2575   | +     | +   | +   |     | ribosomal protein L36                                        | <i>rpmJ</i>  | Protein synthesis               | Ribosomal proteins: synthesis and modification       |
| 24     | VC_2652   | +     | +   | +   |     | conserved hypothetical protein                               |              | Hypothetical proteins           | Conserved                                            |
| 25     | VC_A0019  | +     | +   | +   |     | hypothetical protein                                         |              |                                 |                                                      |
| 26     | VC_A0028  | +     | +   | +   |     | hypothetical protein                                         |              |                                 |                                                      |
| 27     | VC_A0045  | +     | +   | +   |     | protease-related protein                                     |              | Protein fate                    | Degradation of proteins, peptides, and glycopeptides |
| 28     | VC_A0100  | +     | +   | +   |     | phage shock protein E                                        | <i>pspE</i>  | Cellular processes              | Adaptations to atypical conditions                   |
| 29     | VC_A0138  | +     | +   | +   |     | hypothetical protein                                         |              |                                 |                                                      |
| 30     | VC_A0159  | +     | +   | +   |     | conserved hypothetical protein                               |              | Hypothetical proteins           | Conserved                                            |
| 31     | VC_A0182  | +     | +   | +   |     | sigma-54 dependent transcriptional regulator                 |              | Regulatory functions            | Other                                                |
| 32     | VC_A0313  | +     | +   | +   |     | MutT/nudix family protein                                    |              | DNA metabolism                  | DNA replication, recombination, and repair           |
| 33     | VC_A0318  | +     | +   | +   |     | conserved hypothetical protein                               |              | Hypothetical proteins           | Conserved                                            |
| 34     | VC_A0448  | +     | +   | +   |     | hypothetical protein                                         |              |                                 |                                                      |
| 35     | VC_A0480  | +     | +   | +   |     | hypothetical protein                                         |              |                                 |                                                      |
| 36     | VC_A0705  | +     | +   | +   |     | phosphoglycerate transport regulatory protein PgtB, putative |              | Regulatory functions            | Other                                                |
| 37     | VC_A0729  | +     | +   | +   |     | hypothetical protein                                         |              |                                 |                                                      |
| 38     | VC_A0735  | +     | +   | +   |     | hypothetical protein                                         |              |                                 |                                                      |
| 39     | VC_A0844  | +     | +   | +   |     | hypothetical protein                                         |              |                                 |                                                      |
| 40     | VC_A0857  | +     | +   | +   |     | hypothetical protein                                         |              |                                 |                                                      |
| 41     | VC_A0859  | +     | +   | +   |     | oxidoreductase, aldo/keto reductase 2 family                 |              | Central intermediary metabolism | Other                                                |
| 42     | VC_A0889  | +     | +   | +   |     | transcriptional regulator, LysR family                       |              | Regulatory functions            | Other                                                |
| 43     | VC_A1019  | +     | +   | +   |     | conserved hypothetical protein                               |              | Hypothetical proteins           | Conserved                                            |
| 44     | VC_A1080  | +     | +   | +   |     | secretion protein, HlyD family                               |              | Protein fate                    | Protein and peptide secretion and trafficking        |
| 45     | VC_t021   | +     | +   | +   |     |                                                              |              |                                 |                                                      |
| 46     | VC_t042   | +     | +   | +   |     |                                                              |              |                                 |                                                      |
| 47     | VC_t058   | +     | +   | +   |     |                                                              |              |                                 |                                                      |

| Number | Local tag | C6706 |     | CV2 |     | TIGR Common Name                                                | Gene Symbol                                                            | Mainrole | Subrole                                                                         |
|--------|-----------|-------|-----|-----|-----|-----------------------------------------------------------------|------------------------------------------------------------------------|----------|---------------------------------------------------------------------------------|
|        |           | m4C   | m6A | m4C | m6A |                                                                 |                                                                        |          |                                                                                 |
| 48     | VC_t085   | +     | +   | +   |     |                                                                 |                                                                        |          |                                                                                 |
| 49     | VC_0001   | +     | +   |     | +   | hypothetical protein                                            |                                                                        |          |                                                                                 |
| 50     | VC_1243   | +     | +   |     | +   | hypothetical protein                                            |                                                                        |          |                                                                                 |
| 51     | VC_1379   | +     | +   |     | +   | hypothetical protein                                            |                                                                        |          |                                                                                 |
| 52     | VC_2304   | +     | +   |     | +   | hypothetical protein                                            |                                                                        |          |                                                                                 |
| 53     | VC_A0253  | +     | +   |     | +   | antibiotic acetyltransferase                                    | Cellular processes                                                     |          | Toxin production and resistance                                                 |
| 54     | VC_A0463  | +     | +   |     | +   | biphenyl-2,3-diol 1,2-dioxygenase III-related protein           | Central intermediary metabolism                                        |          | Other                                                                           |
| 55     | VC_A0541  | +     | +   |     | +   | hypothetical protein                                            |                                                                        |          |                                                                                 |
| 56     | VC_A1091  | +     | +   |     | +   | chemotaxis protein methyltransferase CheR                       | <i>cheR-3</i> Cellular processes                                       |          | Chemotaxis and motility                                                         |
| 57     | VC_t045   | +     | +   |     | +   |                                                                 |                                                                        |          |                                                                                 |
| 58     | VC_1030   |       |     |     |     | hypothetical protein                                            |                                                                        |          |                                                                                 |
| 59     | VC_1387   |       |     |     |     | hypothetical protein                                            |                                                                        |          |                                                                                 |
| 60     | VC_1648   |       |     |     |     | hypothetical protein                                            |                                                                        |          |                                                                                 |
| 61     | VC_2034   |       |     |     |     | hypothetical protein                                            |                                                                        |          |                                                                                 |
| 62     | VC_2230   |       |     |     |     | phosphoheptose isomerase                                        | <i>lpcA</i> Cell envelope                                              |          | Biosynthesis and degradation of surface polysaccharides and lipopolysaccharides |
| 63     | VC_2328   |       |     |     |     | hypothetical protein                                            |                                                                        |          |                                                                                 |
| 64     | VC_2648   |       |     |     |     | hypothetical protein                                            |                                                                        |          |                                                                                 |
| 65     | VC_2752   |       |     |     |     | hypothetical protein                                            |                                                                        |          |                                                                                 |
| 66     | VC_A0040  |       |     |     |     | conserved hypothetical protein                                  | Hypothetical proteins                                                  |          | Conserved                                                                       |
| 67     | VC_A0109  |       |     |     |     | hypothetical protein                                            |                                                                        |          |                                                                                 |
| 68     | VC_A0189  |       |     |     |     | response regulator                                              | Regulatory functions                                                   |          | Other                                                                           |
| 69     | VC_A0228  |       |     |     |     | vibriobactin and enterobactin ABC transporter, permease protein | <i>vctD</i> Transport and binding proteins                             |          | Cations                                                                         |
| 70     | VC_A0301  |       |     |     |     | oxidoreductase, short-chain dehydrogenase/reductase family      | Central intermediary metabolism                                        |          | Other                                                                           |
| 71     | VC_A0326  |       |     |     |     | hypothetical protein                                            |                                                                        |          |                                                                                 |
| 72     | VC_A0342  |       |     |     |     | hypothetical protein                                            |                                                                        |          |                                                                                 |
| 73     | VC_A0578  |       |     |     |     | conserved hypothetical protein                                  | Hypothetical proteins                                                  |          | Conserved                                                                       |
| 74     | VC_A0625  |       |     |     |     | heme receptor HasR                                              | <i>hasR</i> Transport and binding proteins                             |          | Cations                                                                         |
| 75     | VC_A0653  |       |     |     |     | PTS system, sucrose-specific IIBC component                     | <i>scrA</i> Transport and binding proteins                             |          | Carbohydrates, organic alcohols, and acids                                      |
| 76     | VC_A0672  |       |     |     |     | hypothetical protein                                            |                                                                        |          |                                                                                 |
| 77     | VC_A0752  |       |     |     |     | thioredoxin 2                                                   | <i>trxC</i> Energy metabolism                                          |          | Electron transport                                                              |
| 78     | VC_A0888  |       |     |     |     | transcriptional regulator, LuxR family                          | Regulatory functions                                                   |          | Other                                                                           |
| 79     | VC_A0934  |       |     |     |     | hypothetical protein                                            |                                                                        |          |                                                                                 |
| 80     | VC_A1047  |       |     |     |     | mannitol operon repressor                                       | <i>mtlR</i> Regulatory functions                                       |          | Other                                                                           |
| 81     | VC_A1066  |       | +   |     |     | hypothetical protein                                            |                                                                        |          |                                                                                 |
| 82     | VC_0107   |       |     | +   | +   | hypothetical protein                                            |                                                                        |          |                                                                                 |
| 83     | VC_0226   |       |     | +   | +   | hypothetical protein                                            |                                                                        |          |                                                                                 |
| 84     | VC_0479   |       |     | +   | +   | hypothetical protein                                            |                                                                        |          |                                                                                 |
| 85     | VC_0621   |       |     | +   | +   | hypothetical protein                                            |                                                                        |          |                                                                                 |
| 86     | VC_0805   |       |     | +   | +   | hypothetical protein                                            |                                                                        |          |                                                                                 |
| 87     | VC_0996   |       |     | +   | +   | hypothetical protein                                            |                                                                        |          |                                                                                 |
| 88     | VC_1027   |       |     | +   | +   | molybdenum cofactor biosynthesis protein D                      | <i>moaD</i> Biosynthesis of cofactors, prosthetic groups, and carriers |          | Molybdopterin                                                                   |
| 89     | VC_1239   |       |     | +   | +   | cobinamide kinase/cobinamide phosphate guanylyltransferase      | <i>cobU</i> Biosynthesis of cofactors, prosthetic groups, and carriers |          | Heme, porphyrin, and cobalamin                                                  |
| 90     | VC_1462   |       |     | +   | +   | RstB2 protein                                                   | <i>rstB2</i> Other categories                                          |          | Prophage functions                                                              |
| 91     | VC_1468   |       |     | +   | +   | conserved hypothetical protein                                  | Hypothetical proteins                                                  |          | Conserved                                                                       |
| 92     | VC_1498   |       |     | +   | +   | conserved hypothetical protein                                  | Hypothetical proteins                                                  |          | Conserved                                                                       |

| Number | Local tag | C6706 |     | CV2 |     | TIGR Common Name                              | Gene Symbol                                | Mainrole | Subrole                                              |
|--------|-----------|-------|-----|-----|-----|-----------------------------------------------|--------------------------------------------|----------|------------------------------------------------------|
|        |           | m4C   | m6A | m4C | m6A |                                               |                                            |          |                                                      |
| 93     | VC_1780   | +     |     | +   | +   | hypothetical protein                          |                                            |          |                                                      |
| 94     | VC_1913   | +     |     | +   | +   | conserved hypothetical protein                | Hypothetical proteins                      |          | Conserved                                            |
| 95     | VC_2663   | +     |     | +   | +   | hypothetical protein                          |                                            |          |                                                      |
| 96     | VC_A0007  | +     |     | +   | +   | 3-hydroxyisobutyrate dehydrogenase, putative  | Energy metabolism                          |          | Other                                                |
| 97     | VC_A0292  | +     |     | +   | +   | hypothetical protein                          |                                            |          |                                                      |
| 98     | VC_A0419  | +     |     | +   | +   | hypothetical protein                          |                                            |          |                                                      |
| 99     | VC_A0456  | +     |     | +   | +   | hypothetical protein                          |                                            |          |                                                      |
| 100    | VC_A0483  | +     |     | +   | +   | hypothetical protein                          |                                            |          |                                                      |
| 101    | VC_A0540  | +     |     | +   | +   | formate transporter 1, putative               | Transport and binding proteins             |          | Carbohydrates, organic alcohols, and acids           |
| 102    | VC_A0631  | +     |     | +   | +   | hypothetical protein                          |                                            |          |                                                      |
| 103    | VC_A0638  | +     |     | +   | +   | transporter, AcrB/D/F family                  | Transport and binding proteins             |          | Cations                                              |
| 104    | VC_A0658  | +     |     | +   | +   | methyl-accepting chemotaxis protein           | Cellular processes                         |          | Chemotaxis and motility                              |
| 105    | VC_A0760  | +     |     | +   | +   | arginine ABC transporter, ATP-binding protein | <i>artP</i> Transport and binding proteins |          | Amino acids, peptides and amines                     |
| 106    | VC_A0803  | +     |     | +   | +   | serine protease, putative                     | Protein fate                               |          | Degradation of proteins, peptides, and glycopeptides |
| 107    | VC_A1021  | +     |     | +   | +   | transcriptional regulator, LysR family        | Regulatory functions                       |          | Other                                                |
| 108    | VC_r003   | +     |     | +   | +   |                                               |                                            |          |                                                      |
| 109    | VC_r019   | +     |     | +   | +   |                                               |                                            |          |                                                      |
| 110    | VC_t046   | +     |     | +   | +   |                                               |                                            |          |                                                      |
| 111    | VC_t050   | +     |     | +   | +   |                                               |                                            |          |                                                      |
| 112    | VC_A0244  |       | +   | +   | +   | sugar isomerase SgaE, AraD/FucA family        | Energy metabolism                          |          | Sugars                                               |
| 113    | VC_A0399  |       | +   | +   | +   | hypothetical protein                          |                                            |          |                                                      |
| 114    | VC_A0635  |       | +   | +   | +   | transcriptional regulator, LysR family        | Regulatory functions                       |          | Other                                                |
| 115    | VC_A1015  |       | +   | +   | +   | Na <sup>+</sup> /H <sup>+</sup> antiporter    | <i>nhaD</i> Transport and binding proteins |          | Cations                                              |
| 116    | VC_A0698  | +     |     | +   | +   | hypothetical protein                          |                                            |          |                                                      |
