# Supplementary material for: A mobile restriction modification system consisting of methylases on the IncA/C plasmid
Source: PubMed Central journal article supplement (PMC6555945; doi:10.1186/s13100-019-0168-1), 2019-06-07
Supplement: 13100_2019_168_MOESM2_ESM.pdf [file 13100_2019_168_MOESM2_ESM.pdf]

C

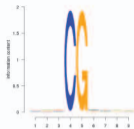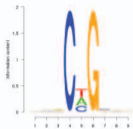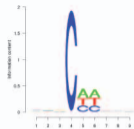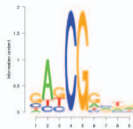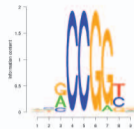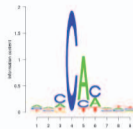

CV2

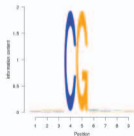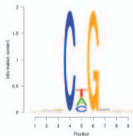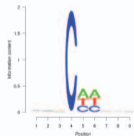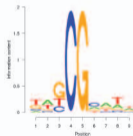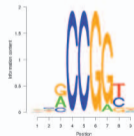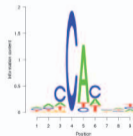

CG

CHG

CHH

mCG

mCHG

mCHH

**Supplementary figure 1.** The methylation percentage of the 9 bases flanking the methylation site of (mC at the fourth base).
