# Supplementary material for: A mobile restriction modification system consisting of methylases on the IncA/C plasmid
Source: PubMed Central journal article supplement (PMC6555945; doi:10.1186/s13100-019-0168-1), 2019-06-07
Supplement: 13100_2019_168_MOESM3_ESM.pdf [file 13100_2019_168_MOESM3_ESM.pdf]

Supplementary table 3. Primers used in this study

| Primers         | Sequences                                    |
|-----------------|----------------------------------------------|
| kan-844-stuI-U  | <u>AAAAGGCCTT</u> GTAGGCTGGAGCTGCTTCG        |
| kan-844-stuI-L  | <u>AAAAGGCCT</u> ATGGGAATTAGCCATGGTCC        |
| del dcm1-1-SacI | <u>CGAGCTC</u> ATAAGCTGTACAGCACTGGTTC        |
| del dcm1-2      | CCGTCCCAATCGGGAAGTAATG                       |
| del dcm1-3      | CATTACTTCCCGATTGGGACGGGAGACGCAATCATGGTCACTTC |
| del dcm1-4-SpeI | <u>GGACTAGT</u> AAGAGGTACGGAGCTACGCCAG       |
| del dcm2-1-SacI | <u>CGAGCTC</u> AACCGCCTGATCGCTATGGAAG        |
| del dcm2-2      | CGATCGGTAACATTGGTCAACC                       |
| del dcm2-3      | GGTTGACCAATGTTACCGATCGTTGACTGGCGGGGTAGACATTC |
| del dcm2-4-SpeI | <u>GGACTAGT</u> TCTCAGTTTTCGGTGGAACGAAC      |
| del dcm3-1-SacI | <u>CGAGCTC</u> TACTGGAGCAAGCGTAATCC          |
| del dcm3-2      | TGAACATGGCGTCCTCCATC                         |
| del dcm3-3      | GATGGAGGACGCCATGTTTCATTCGCATCGAGGTAGGTGTC    |
| del dcm3-4-SpeI | <u>GGACTAGT</u> CCCAGTTCACTGAGCACTAG         |
| ctxAB-L         | CTCAGACGGGATTTGTTAGGCACG                     |
| ctxAB-U         | AATTGCGGCAATCGCATGAG                         |
| repA-F          | CGTTGGGGTTCATCAATG                           |
| repA-R          | TACGACGCGAACCAGATC                           |
| dcm1-test-U     | TGGCGTAACAGCTTGAGCAATCTAC                    |
| dcm1-test-L     | GGTACTTCTGCATTTTGCATAGTCC                    |
| dcm2-test-L     | CCTTGTCCAGAAAACCTCAATAACG                    |
| dcm3-test-L     | GATCTCATCCACCAGCTTCC                         |
| kan-mini-U      | GTGGAGAGGCTATTCGGCTATG                       |
| kan-mini-L      | TACTTTCTCGGCAGGAGCAAGG                       |
